# Supplementary material
Source: Springer Nature journal article supplement (https://www.springermedizin.de/resource/supplementary/12970_2012_306_MOESM5_ESM.pdf/9594782)

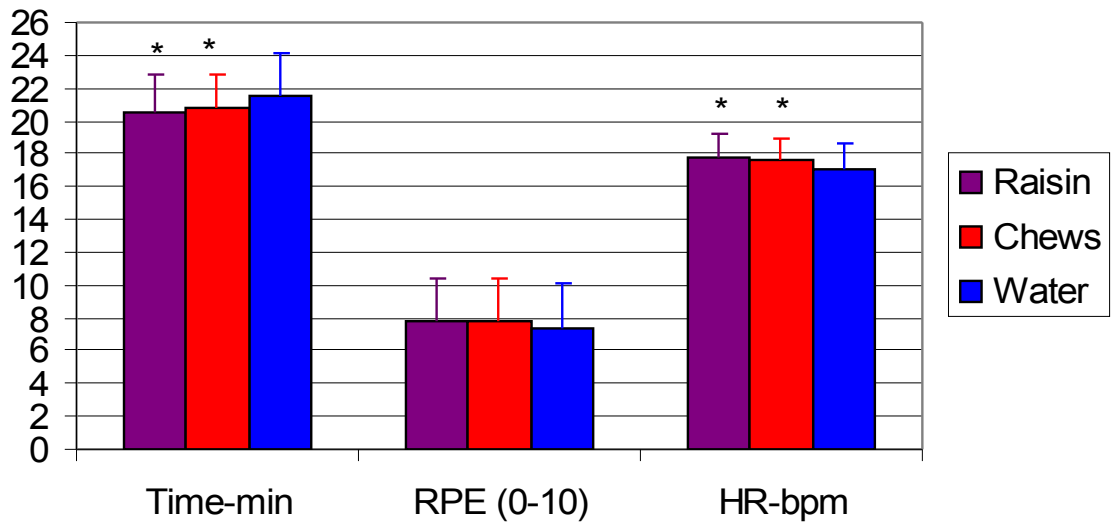

Supplement: MOESM5 [file 9594782]
